# Supplementary material
Source: PubMed Central journal article supplement (PMC6640782)
Supplement: ao6b00275_si_001.pdf [file ao6b00275_si_001.pdf]

## Supporting Information

### **Synergistically Enhanced Electrocatalytic Performance of N-Doped Graphene Quantum Dots Decorated Three-Dimensional MoS<sub>2</sub>-Graphene Nanohybrid for Oxygen Reduction Reaction**

**Ramalingam Vinoth,<sup>†</sup> Indrajit M. Patil,<sup>†</sup> Alagarsamy Pandikumar,<sup>†</sup> Bhalchandra A. Kakade,<sup>†</sup> Huang Nay Ming,<sup>‡</sup> Dionysios D. Dionysiou<sup>§</sup> and Bernaurdshaw Neppolian<sup>†,\*</sup>**

<sup>†,\*</sup>SRM Research Institute, SRM University, Kattankulathur, Kancheepuram 603203 (D.t.), Tamil Nadu, India.

<sup>‡</sup>Low Dimensional Materials Research Centre, Department of Physics, Faculty of Science, University of Malaya, 50603 Kuala Lumpur, Malaysia.

<sup>§</sup>Environmental Engineering and Science Program, Department of Biomedical, Chemical and Environmental Engineering, University of Cincinnati, Cincinnati, OH 45221-0012, USA.

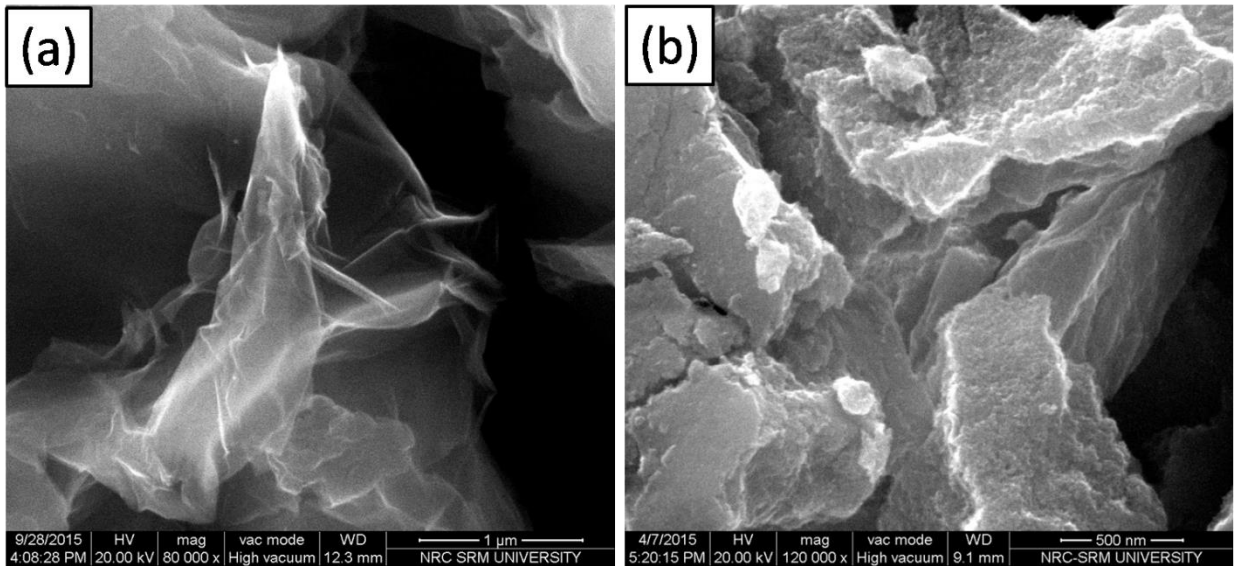

**Figure S1.** FE-SEM image of (a) GO and (b) MoS<sub>2</sub>.

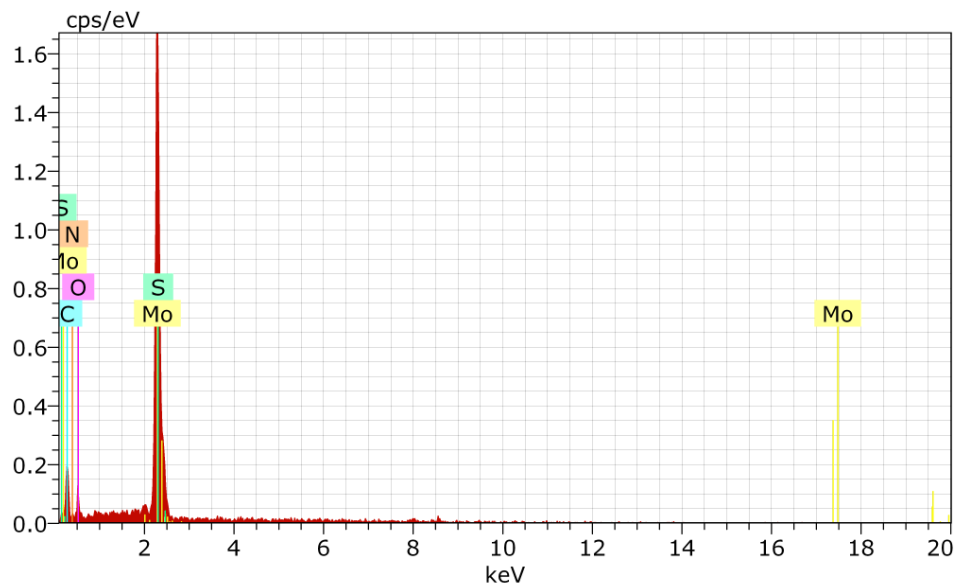

**Figure S2.** EDX spectrum of N-GQDs/MoS<sub>2</sub>-rGO nanohybrid.

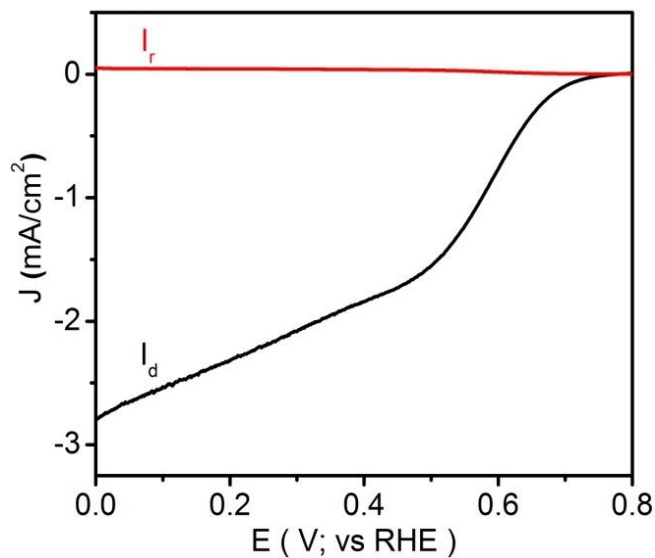

**Figure S3.** Disk current ( $I_d$ ) and the corresponding ring current ( $I_r$ ) for 3D N-GQDs/MoS<sub>2</sub>-rGO nanohybrid using RRDE in the presence of O<sub>2</sub> saturated 0.1 M KOH at 1600 rpm with the scan rate of 10 mV/s.

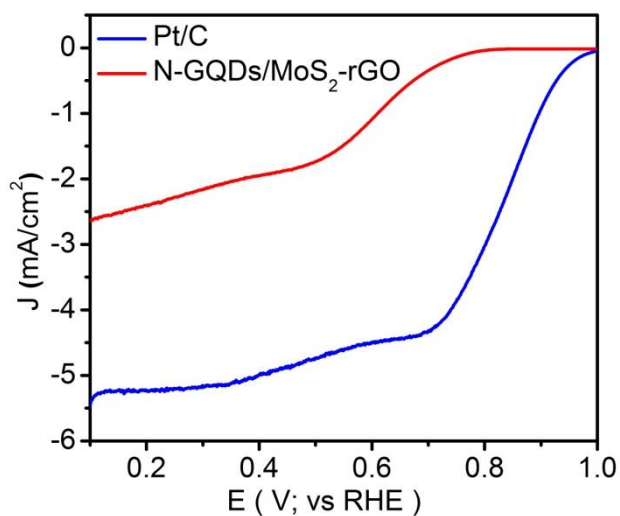

**Figure S4.** LSV comparison of N-GQDs/MoS<sub>2</sub>-rGO nanohybrid with commercial Pt/C catalyst in the presence of O<sub>2</sub> saturated 0.1M KOH at 1600 rpm with the scan rate of 10 mV/s.

**Table S1.** Comparison on the electrocatalytic performance of some carbonaceous nanomaterials based electrocatalysts toward oxygen reduction reaction.

| <b>Electrocatalyst</b>                                      | <b>Method</b>       | <b>Electrolyte</b> | <b>Current density at 1600 rpm (mA/cm<sup>2</sup>)</b> | <b>Onset potential (V) vs. RHE</b> | <b>Ref.</b>      |
|-------------------------------------------------------------|---------------------|--------------------|--------------------------------------------------------|------------------------------------|------------------|
| MoS <sub>2</sub> NDs/NGr                                    | Thermal annealing   | 0.1M KOH           | 4.7                                                    | 0.93                               | 1                |
| MoS <sub>2</sub> /N doped graphene                          | Hydrothermal        | 0.1M KOH           | 4                                                      | 0.88                               | 2                |
| B,N-GQD/Graphene                                            | CVD                 | 0.1M KOH           | 4.5                                                    | 0.99                               | 3                |
| N, P, S co-doped graphene                                   | Thermal annealing   | 0.1M KOH           | NA                                                     | 0.68                               | 4                |
| Co(OH) <sub>2</sub> -MoS <sub>2</sub> /rGO                  | Hydrothermal        | 0.1M KOH           | NA                                                     | 0.85                               | 5                |
| N doped carbon dots                                         | Sovothermal         | 0.1M KOH           | NA                                                     | 0.83                               | 6                |
| 3D N doped graphene                                         | Thermal annealing   | 0.1M KOH           | NA                                                     | 0.83                               | 7                |
| 3D crumpled graphene –cobalt oxide                          | Thermal annealing   | 1 M KOH            | NA                                                     | 0.90                               | 8                |
| 3D Fe <sub>3</sub> O <sub>4</sub> -N doped graphene aerogel | Hydrothermal        | 0.1M KOH           | NA                                                     | 0.80                               | 9                |
| 3D rGO/BN composite                                         | Hydrothermal        | 0.1M KOH           | 3.0                                                    | 0.79                               | 10               |
| <b>3D N-GQDs/ MoS<sub>2</sub>-rGO nanohybrid</b>            | <b>Hydrothermal</b> | <b>0.1M KOH</b>    | <b>2.56</b>                                            | <b>0.81</b>                        | <b>This work</b> |

**Note:** The potential conversion of Ag/AgCl and SCE into RHE was calculated using the standard conversion factor

## References

- (1) Du, C.; Huang, H.; Feng, X.; Wu, S.; Song, W. Confining MoS<sub>2</sub> Nanodots in 3D Porous Nitrogen-Doped Graphene with Amendable ORR Performance. *J. Mater. Chem. A* **2015**, *3*, 7616-7622.
- (2) Zhao, K.; Gu, W.; Zhao, L.; Zhang, C.; Peng, W.; Xian, Y. MoS<sub>2</sub>/Nitrogen-Doped Graphene as Efficient Electrocatalyst for Oxygen Reduction Reaction. *Electrochim. Acta* **2015**, *169*, 142-149.
- (3) Fei, H.; Ye, R.; Ye, G.; Gong, Y.; Peng, Z.; Fan, X.; Samuel, E. L.; Ajayan, P. M.; Tour, J. M. Boron-and Nitrogen-Doped Graphene Quantum Dots/Graphene Hybrid Nanoplatelets as Efficient Electrocatalysts for Oxygen Reduction. *ACS Nano* **2014**, *8*, 10837-10843.
- (4) Ma, Y.; Zhang, L.; Li, J.; Ni, H.; Li, M.; Zhang, J.; Feng, X.; Fan, Q.; Hu, Z.; Huang, W. Carbon-Nitrogen/Graphene Composite as Metal-Free Electrocatalyst for the Oxygen Reduction Reaction. *Chin. Sci. Bull.* **2011**, *56*, 3583-3589.
- (5) Illathvalappil, R.; Unni, S. M.; Kurungot, S. Layer-Separated MoS<sub>2</sub> Bearing Reduced Graphene Oxide Formed by an In Situ Intercalation-Cum-Anchoring Route Mediated by Co(OH)<sub>2</sub> as a Pt-Free Electrocatalyst for Oxygen Reduction. *Nanoscale* **2015**, *7*, 16729-16736.
- (6) Lei, Z.; Xu, S.; Wan, J.; Wu, P. Facile Synthesis of N-Rich Carbon Quantum Dots by Spontaneous Polymerization and Incision of Solvents as Efficient Bioimaging Probes and Advanced Electrocatalysts for Oxygen Reduction Reaction. *Nanoscale* **2016**, *8*, 2219-2226.
- (7) Lin, Z.; Waller, G. H.; Liu, Y.; Liu, M.; Wong, C.-P. 3D Nitrogen-Doped Graphene Prepared by Pyrolysis of Graphene Oxide with Polypyrrole for Electrocatalysis of Oxygen Reduction Reaction. *Nano Energy* **2013**, *2*, 241-248.

- (8) Mao, S.; Wen, Z.; Huang, T.; Hou, Y.; Chen, J., High-Performance Bi-Functional Electrocatalysts of 3d Crumpled Graphene–Cobalt Oxide Nanohybrids for Oxygen Reduction and Evolution Reactions. *Energy Environ. Sci.* **2014**, *7*, 609-616.
- (9) Wu, Z.-S.; Yang, S.; Sun, Y.; Parvez, K.; Feng, X.; Müllen, K., 3D Nitrogen-Doped Graphene Aerogel-Supported Fe<sub>3</sub>O<sub>4</sub> Nanoparticles as Efficient Electrocatalysts for the Oxygen Reduction Reaction. *J. Am. Chem. Soc.* **2012**, *134*, 9082-9085.
- (10) Patil, I. M.; Lokanathan, M.; Kakade, B. Three Dimensional Nanocomposite of Reduced Graphene Oxide and Hexagonal Boron Nitride as an Efficient Metal-Free Catalyst for Oxygen Electroreduction. *J. Mater. Chem. A* **2016**, *4*, 4506-4515.
